# Supplementary material for: Landscape Genetics Reveals Focal Transmission of a Human Macroparasite
Source: PLOS journal article supplement (doi:10.1371/journal.pntd.0000665), 2010-04-20

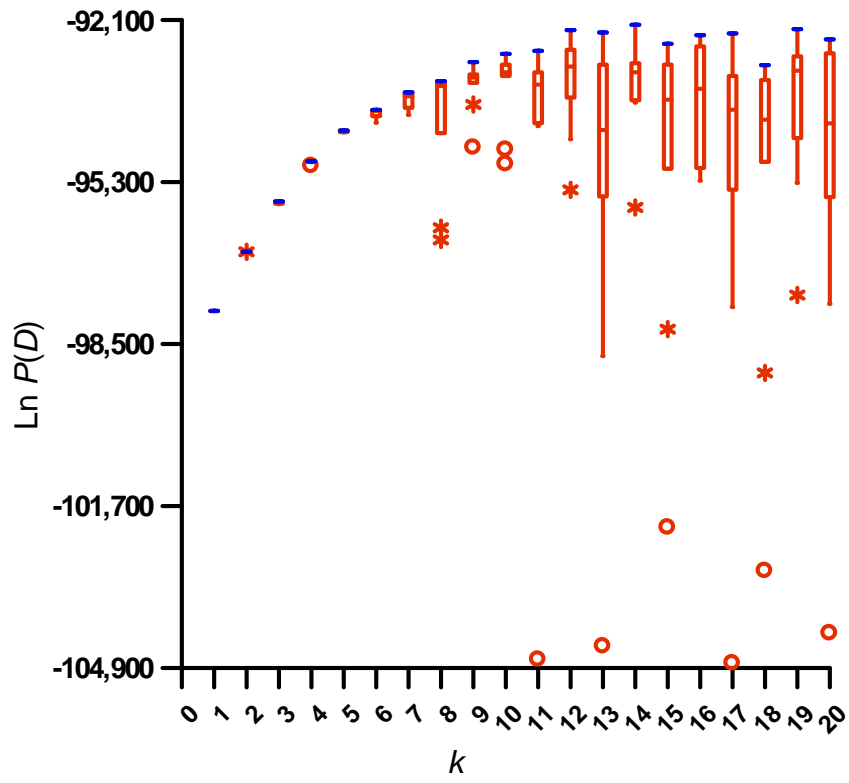

Supplement: S2 (10.1371/journal.pntd.0000665.s002) [file journal.pntd.0000665.s002]
